# Supplementary material
Source: PubMed Central journal article supplement (PMC5518874)
Supplement: cr201754x1.pdf [file cr201754x1.pdf]

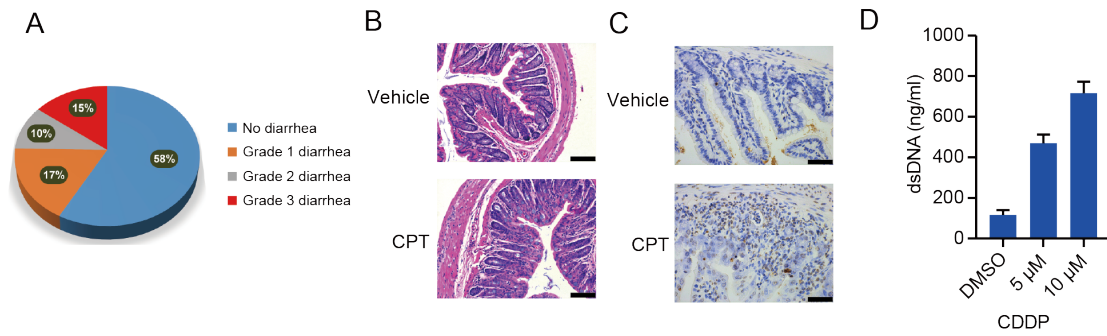

**Supplementary information, Figure S1. CPT-11 triggers double-strand DNA release in vivo and in vitro.**

(A) The percentage of different grades of diarrhoea among 69 patients following irinotecan treatment.

(B) Representative H&E staining images of colon sections from wild-type mice treated with CPT-11. Scale bar, 100  $\mu$ m.

(C) Representative TUNEL-stained ileum sections from wild-type mice treated with CPT-11. Scale bar, 50  $\mu$ m.

(D) DNA concentration in the culture medium of HCT116 cells treated with cisplatin.

The data (D) are representative of three independent experiments and depict the means  $\pm$  SD.
