# Supplementary material
Source: PubMed Central journal article supplement (PMC5518874)
Supplement: cr201754x2.pdf [file cr201754x2.pdf]

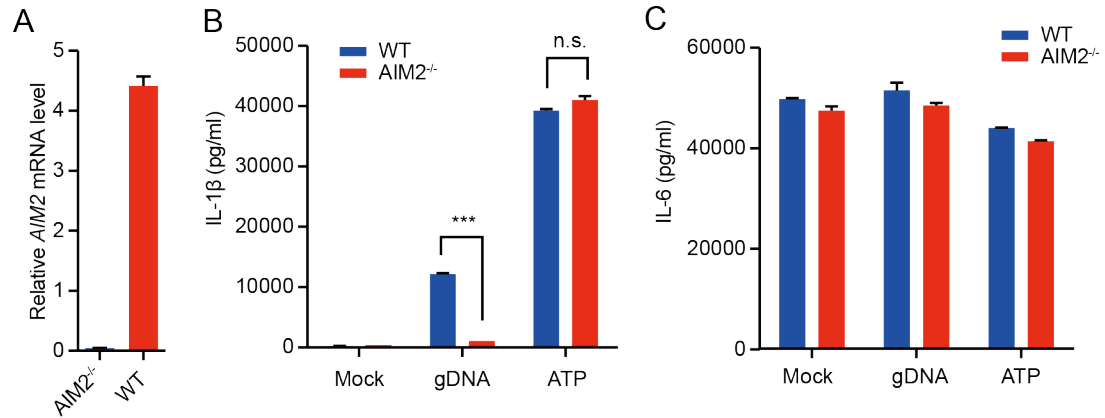

**Supplementary information, Figure S2. CPT-11-induced dsDNA release activates the AIM2 inflammasome.**

(A) Quantitative PCR analysis of the relative AIM2 mRNA levels between AIM2<sup>-/-</sup> and wild-type (WT) mice.

(B-C) Production of IL-1β (B) or IL-6 (C) in LPS-primed BMDCs transfected with 1.0 μg/ml genomic DNA (gDNA) for 6 hours or stimulated with 5 mM ATP for 30 min.

The data are representative of three independent experiments and depict the means ± SEM. n.s, not significant; \*\*\*p < 0.001.
