# Supplementary material
Source: PubMed Central journal article supplement (PMC5518874)
Supplement: cr201754x3.pdf [file cr201754x3.pdf]

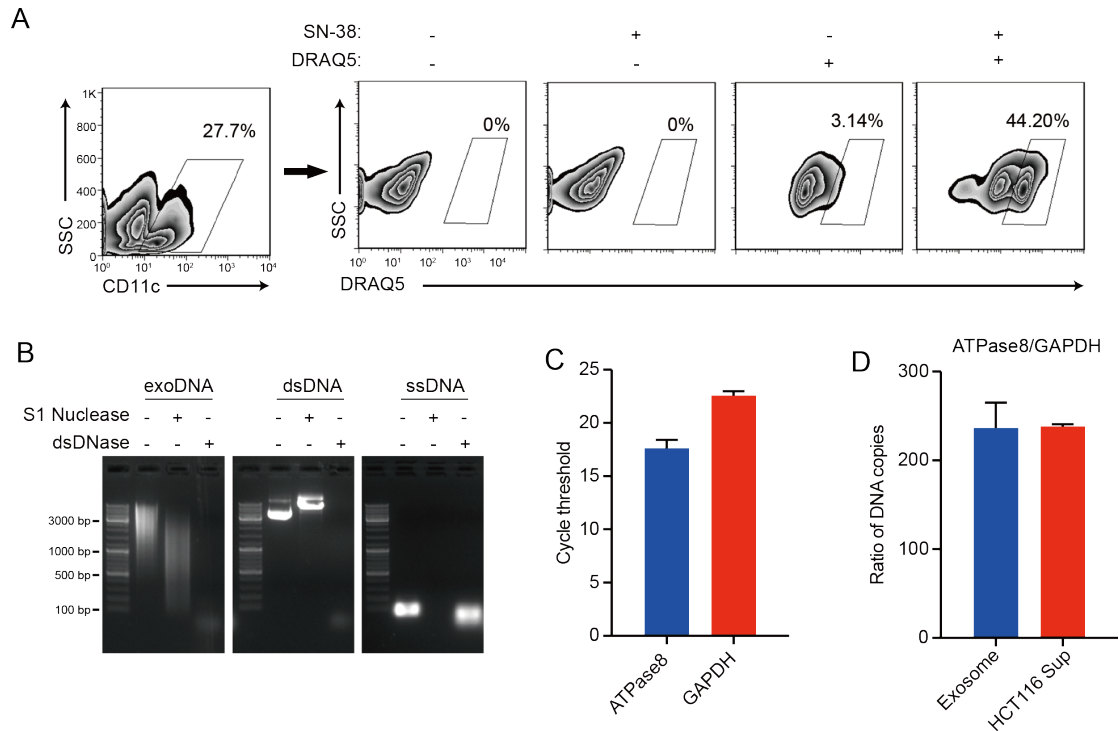

**Supplementary information, Figure S3. Released dsDNA can be transferred into macrophages via exosomes..**

(A) Flow cytometry analysis of co-cultured bone marrow-derived dendritic cells and HCT116 cells. Prior to co-culture, HCT116 cells were stained with or without DRAQ5 (10  $\mu$ M) and then treated with or without SN-38 (500 nM). After co-culture, total cells were collected, labelled with anti-mouse CD11c antibody, and then analysed by flow cytometry.

(B) Exosomes in the culture medium of HCT-116 cells following SN-38 treatment were isolated by differential centrifugation. Exosome DNA (exoDNA) was extracted with DNeasy kit (Qiagen) from exosomes. Exosome DNA then exposed to S1 Nuclease or dsDNase treatment at 37  $^{\circ}$ C for 60 min. dsDNA (~4 kb, middle panel) and ssDNA (86 bp, right panel) were used as controls.

(C) Quantitative PCR analysis of ATPase8 and GAPDH DNA copies in the released DNA-containing exosomes isolated from SN-38-treated HCT116 cells.

(D) Quantitative PCR analysis of relative ATPase8 and GAPDH DNA copies in the released DNA from exosome-DNA and input-DNA.

The data are representative of three independent experiments and depict the means  $\pm$  SEM.
