# Supplementary material
Source: PubMed Central journal article supplement (PMC5518874)
Supplement: cr201754x5.pdf [file cr201754x5.pdf]

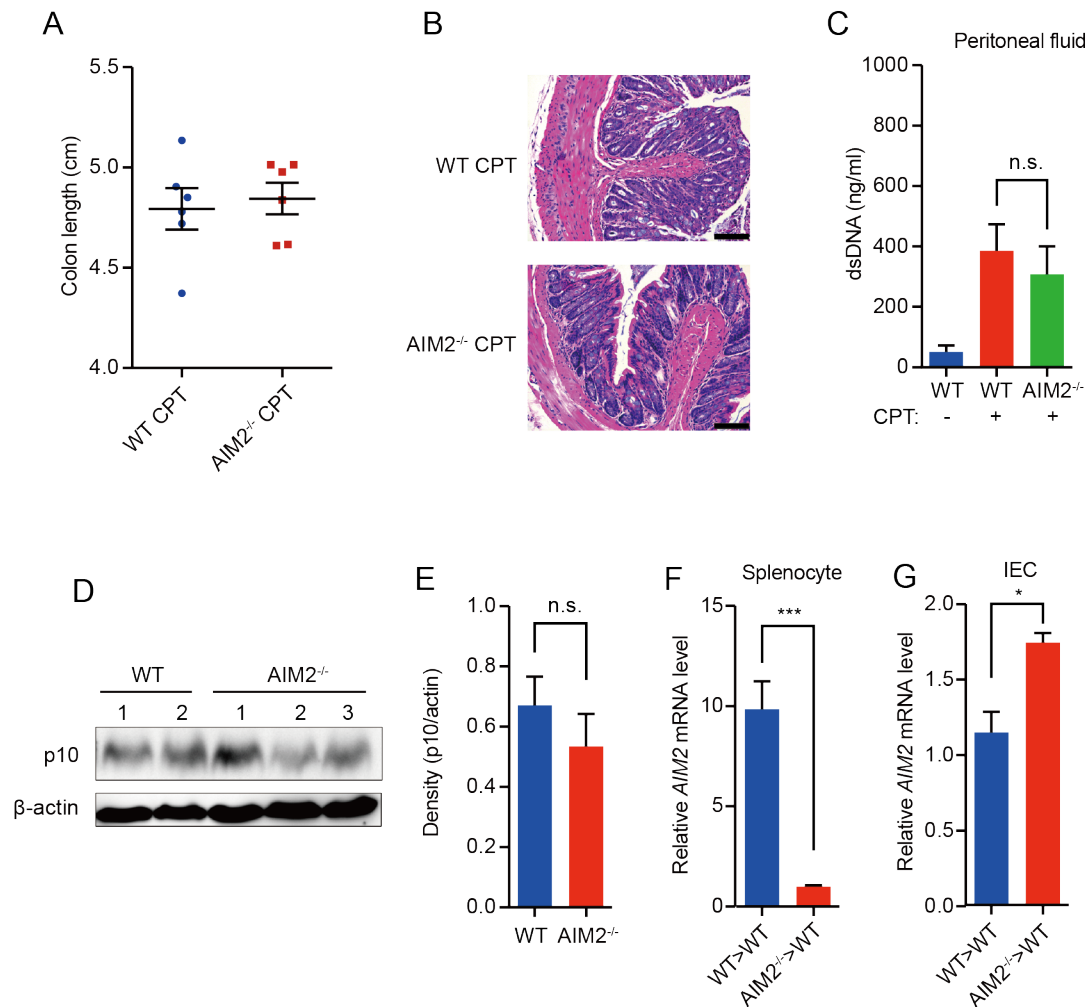

**Supplementary information, Figure S5. AIM2 deficient mice exhibit attenuated intestinal mucositis and diarrhoea upon CPT treatment.**

(A) Colon length of AIM2<sup>-/-</sup> and WT mice after four consecutive CPT-11 administrations.

(B) Representative H&E images of CPT-11-treated mouse colons on day 5. Scale bar, 100 μm.

(C) Concentration of dsDNA in the peritoneal lavage fluid after four consecutive CPT-11 administrations. WT mock served as a negative control.

(D) Immunoblot analysis of caspase 1 p10 in the colon lysates of wild-type and AIM2<sup>-/-</sup> mice treated with CPT-11 for three consecutive days.

(E) Densitometric quantification of the band intensity of p10 and actin in (D).

(F-G) Quantitative PCR analysis of the relative AIM2 mRNA levels in splenocytes (F) and intestine epithelial cells (IEC) (G) between WT>WT mice and AIM2<sup>-/-</sup>>WT mice.

Each symbol represents one mouse (A). The data are representative of three independent experiments and depict the means ± SEM. n.s., not significant; \*p < 0.05, \*\*\*p < 0.001.
